# Supplementary material
Source: publisher figshare collection journal article supplement (https://acs.figshare.com/ndownloader/files/4120513)
Supplement: Supplementary file 1 [file 4120513]

## Supporting materials:

### S1: Detailed speciation of HAN, HK and HAA at different contact time (water age).

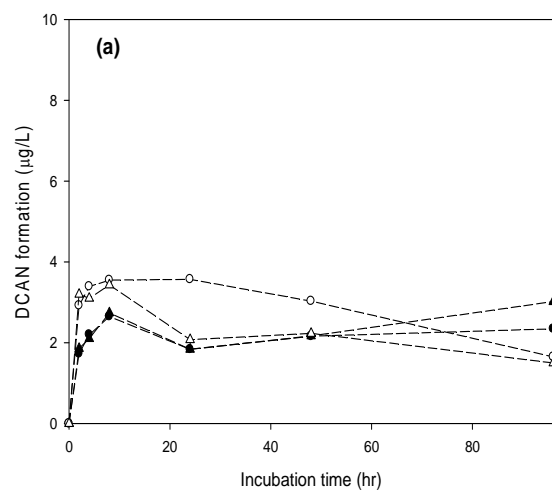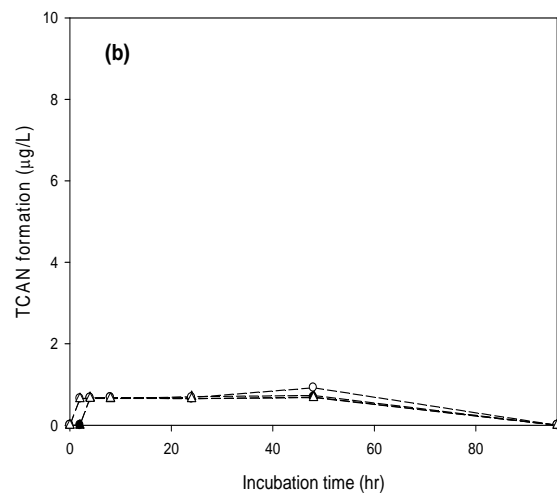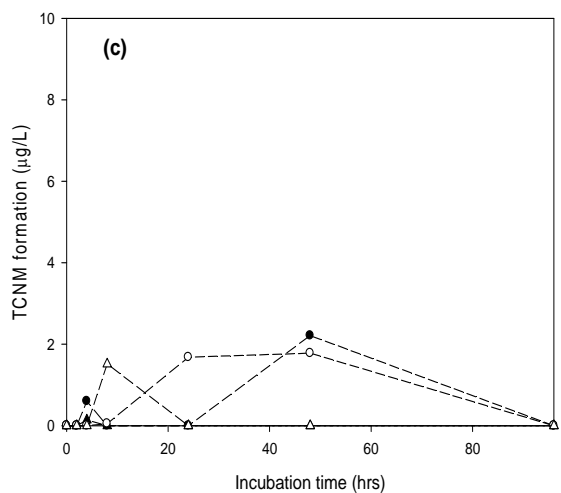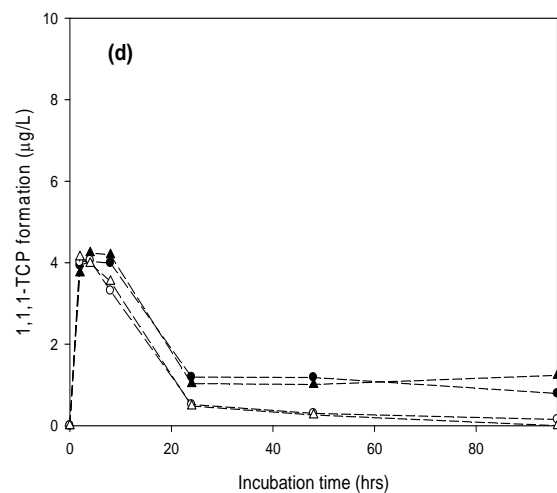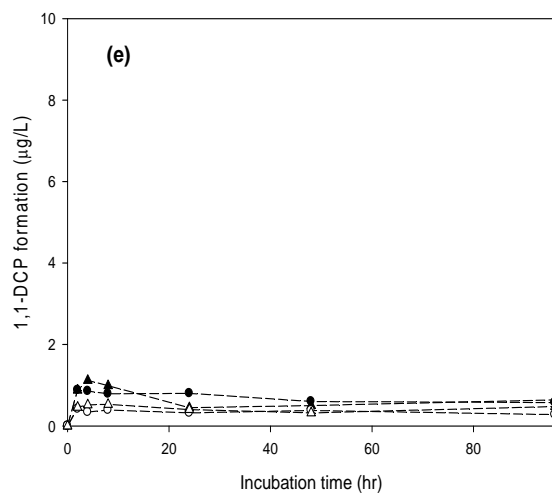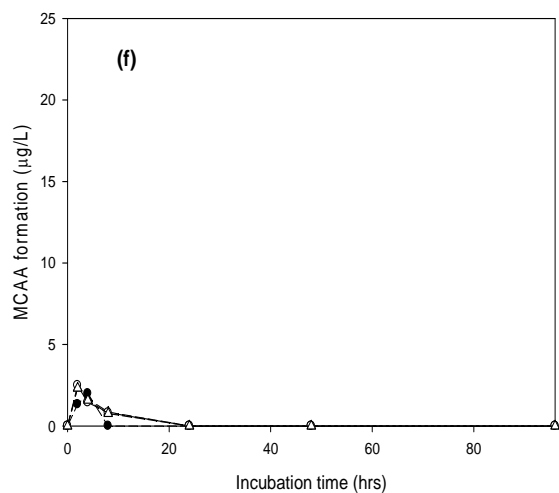

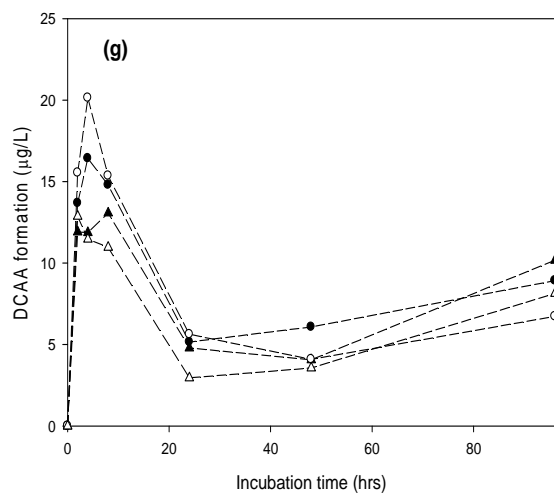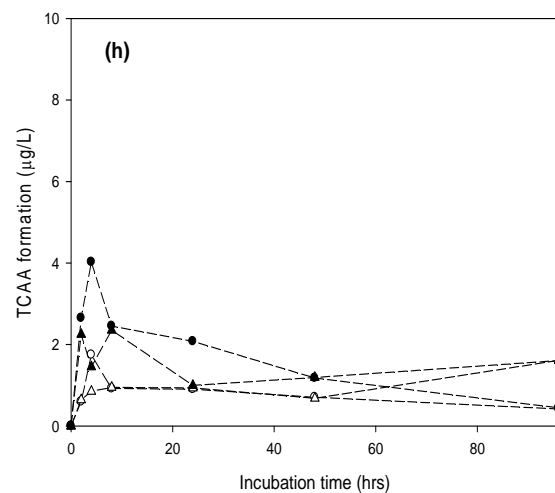

Figure S1. Detailed speciation of HAN, HK and HAA at different water age with incubation of 5 mg/L Cl<sub>2</sub>. ●—PAO1 at pH=5.5; ▲—*P. putida* at pH=5.5; ○—PAO1 at pH=7.5; △—*P. putida* at pH=7.5.

**S 2: Detailed speciation of regulated and emerging DBPs in Fig. 4**

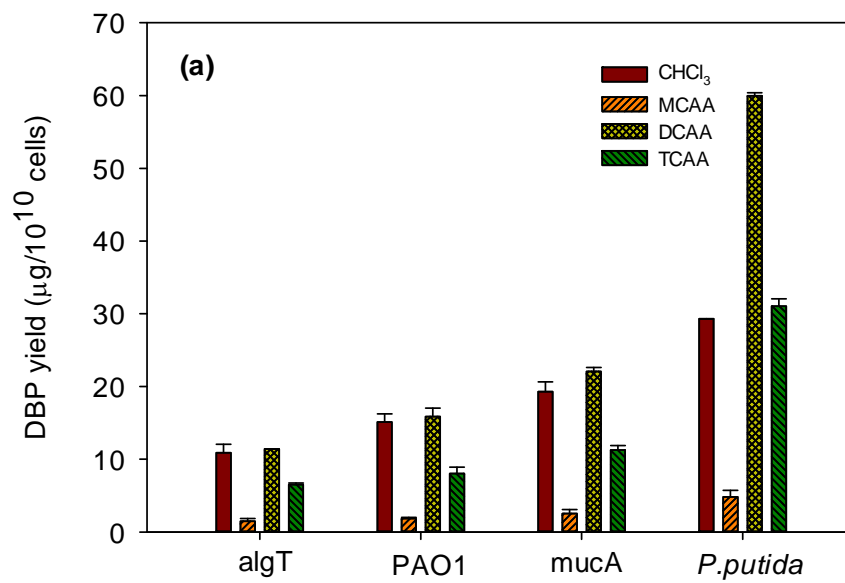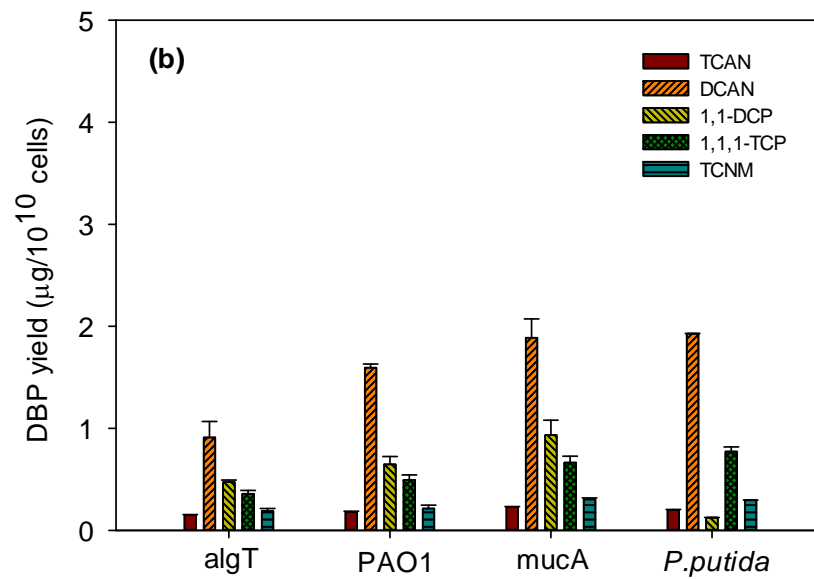

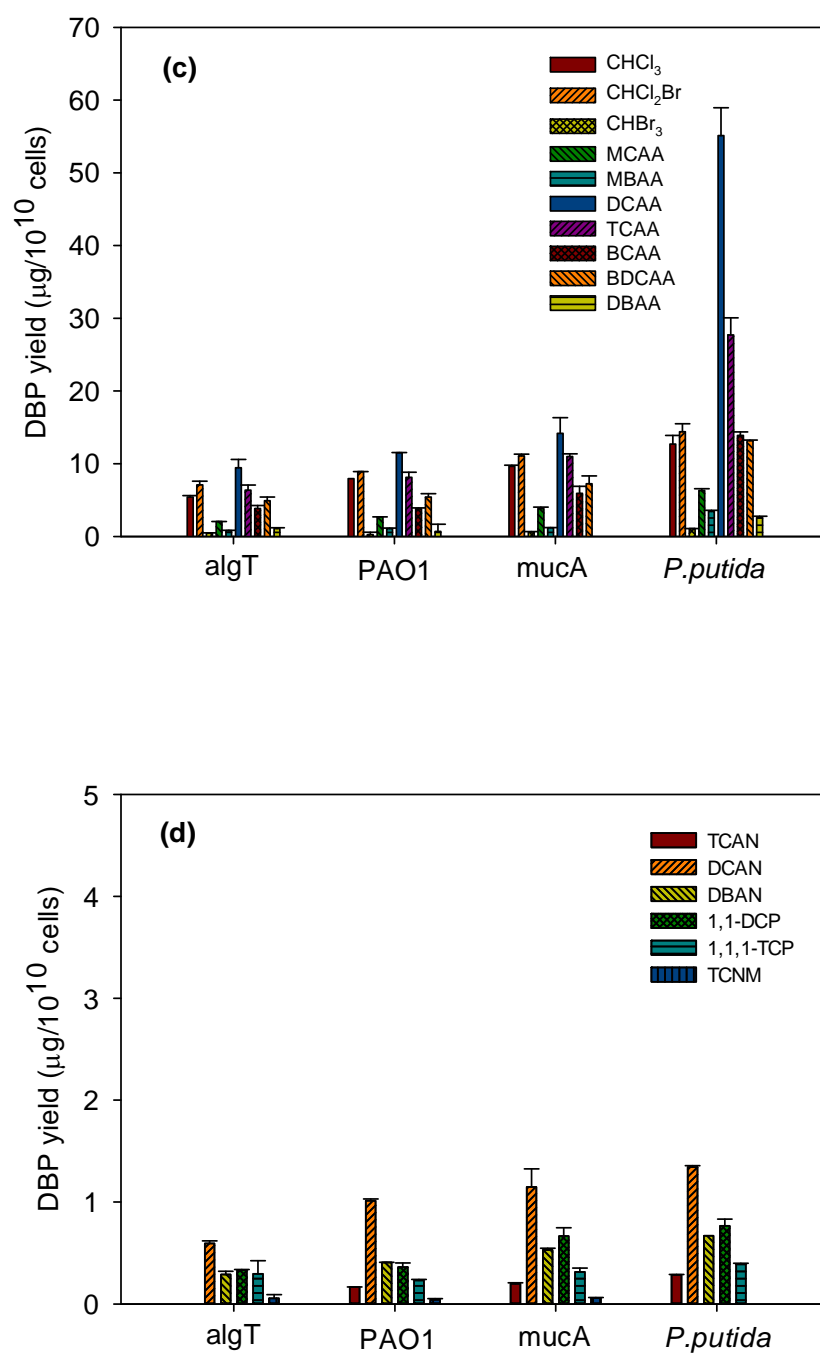

Figure S2: DBP yield upon chlorination of bacterial cells (detailed species) (a) regulated DBPs (THMs and HAAs) without bromide; (b) emerging DBPs (HANs, HKs and TCNM) without bromide; (c) regulated DBPs with bromide; (d) emerging DBPs with bromide

### S3: Statistical analysis of DBP yields data.

Table S3-1: Results of one way ANOVA test for DBP yield among different bacterial cultures without bromide.

| Bacterial cultures                       | algT                   |                       | PAO1               |           | mucA              |           | <i>P.putida</i>    |           | <b>P<sup>3</sup></b> |
|------------------------------------------|------------------------|-----------------------|--------------------|-----------|-------------------|-----------|--------------------|-----------|----------------------|
|                                          | <b>Ave<sup>1</sup></b> | <b>SD<sup>2</sup></b> | <b>Ave</b>         | <b>SD</b> | <b>Ave</b>        | <b>SD</b> | <b>Ave</b>         | <b>SD</b> |                      |
| DBP yield<br>(µg/10 <sup>10</sup> cells) |                        |                       |                    |           |                   |           |                    |           |                      |
| THM                                      | 10.9 <sup>ab</sup>     | 1.2                   | 15.1 <sup>a</sup>  | 1.1       | 19.3 <sup>a</sup> | 1.3       | 29.3 <sup>c</sup>  | 0.0       | <0.001               |
| HAA                                      | 19.4 <sup>a</sup>      | 0.6                   | 25.7 <sup>b</sup>  | 2.2       | 35.9 <sup>c</sup> | 0.6       | 95.8 <sup>d</sup>  | 0.5       | <0.001               |
| HAN                                      | 1.1 <sup>b</sup>       | 0.2                   | 1.8 <sup>a</sup>   | 0.0       | 2.1 <sup>ab</sup> | 0.2       | 2.1 <sup>c</sup>   | 0.0       | 0.006                |
| HK                                       | 0.8 <sup>a</sup>       | 0.0                   | 1.1 <sup>b</sup>   | 0.1       | 1.6 <sup>ab</sup> | 0.2       | 0.9 <sup>a</sup>   | 0.0       | 0.011                |
| TCNM                                     | 0.2 <sup>a</sup>       | 0.0                   | 0.2 <sup>a/b</sup> | 0.0       | 0.3 <sup>a</sup>  | 0.0       | 0.3 <sup>a/c</sup> | 0.0       | 0.014                |

1: Average category of DBP yield from duplicate sample

2: Standard Deviation

3: P-value of one way-ANOVA test. P<0.05 indicates there is significant statistical difference in certain DBP yield among four tested strains.

In each row, numbers not followed by a common letter are significantly different based on pairwise Tukey test (P<0.05).

Table S3-2: Results of one-way ANOVA test of DBP yield among different bacterial cultures with bromide.

| Bacterial culture                        | algT                   |                       | PAO1                |           | mucA                |           | <i>P.putida</i>    |           | <b>P<sup>3</sup></b> |
|------------------------------------------|------------------------|-----------------------|---------------------|-----------|---------------------|-----------|--------------------|-----------|----------------------|
|                                          | <b>Ave<sup>1</sup></b> | <b>SD<sup>2</sup></b> | <b>Ave</b>          | <b>SD</b> | <b>Ave</b>          | <b>SD</b> | <b>Ave</b>         | <b>SD</b> |                      |
| DBP yield<br>(µg/10 <sup>10</sup> cells) |                        |                       |                     |           |                     |           |                    |           |                      |
| THM                                      | 12.9 <sup>a</sup>      | 0.7                   | 17.1 <sup>a/b</sup> | 0.3       | 21.4 <sup>a</sup>   | 0.1       | 28.2 <sup>a</sup>  | 2.3       | <0.001               |
| HAA                                      | 28.5 <sup>a</sup>      | 2.9                   | 33.4 <sup>a</sup>   | 0.2       | 43.4 <sup>a/b</sup> | 4.4       | 121.2 <sup>a</sup> | 6.6       | <0.001               |
| HAN                                      | 0.9 <sup>a</sup>       | 0.1                   | 1.6 <sup>a</sup>    | 0.0       | 1.8 <sup>a/b</sup>  | 0.3       | 2.3 <sup>a</sup>   | 0.0       | 0.005                |
| HK                                       | 0.6 <sup>a</sup>       | 0.1                   | 0.6 <sup>a/b</sup>  | 0.1       | 1.0 <sup>a/b</sup>  | 0.1       | 1.2 <sup>a</sup>   | 0.1       | 0.011                |
| TCNM                                     | 0.1                    | 0.0                   | 0.0                 | 0.0       | 0.1                 | 0.0       | 0.0                | 0.0       | 0.086                |

1: Average of category of DBP yield from duplicate sample

2: Standard Deviation

3: P-value of one way-ANOVA test. P<0.05 indicates there is significant statistical difference in certain DBP yield among four tested strains.

In each row, numbers not followed by a common letter are significantly different based on pairwise Tukey test (P<0.05).

Table S3-3: t-test results of DBP yield between polysaccharide based EPS and protein based EPS without bromide.

| Extracted EPS      | P. aeruginosa EPS |     | P. putida EPS |     | P <sup>1</sup> |
|--------------------|-------------------|-----|---------------|-----|----------------|
|                    | Ave.              | SD  | Ave.          | SD  |                |
| DBP yield (µg/mgC) |                   |     |               |     |                |
| THM                | 46.9              | 0.5 | 70.7          | 4.8 | 0.010          |
| HAA                | 52.7              | 8.7 | 75.0          | 4.7 | 0.043          |
| HAN                | 1.0               | 0.0 | 1.8           | 0.5 | 0.076          |
| HK                 | 1.1               | 0.0 | 1.8           | 0.4 | 0.049          |
| TCNM               | 0.5               | 0.1 | 1.0           | 0.3 | 0.102          |

1: One-tailed P-value of t-test. P<0.05 indicates that there is significant statistical difference between two extracted EPS

Table S3-4: t-test results of DBP yield between polysaccharide based EPS and protein based EPS with bromide.

| Extracted EPS      | P. aeruginosa EPS |      | P. putida EPS |     | P <sup>1</sup> |
|--------------------|-------------------|------|---------------|-----|----------------|
|                    | Ave.              | SD   | Ave.          | SD  |                |
| DBP yield (µg/mgC) |                   |      |               |     |                |
| THM                | 51.2              | 3.3  | 62.6          | 3.4 | 0.038          |
| HAA                | 82.5              | 11.2 | 102.8         | 7.6 | 0.083          |
| HAN                | 1.0               | 0.1  | 1.7           | 0.5 | 0.101          |
| HK                 | 0.7               | 0.1  | 1.2           | 0.1 | 0.023          |
| TCNM               | 0.0               | 0.0  | 0.2           | 0.0 | 0.028          |

1: One-tailed P-value of t-test. P<0.05 indicates that there is significant statistical difference between two extracted EPS

Table S3-5: t-test results of DBP yield (C-DBP and N-DBP) between polysaccharide based EPS and protein based EPS without bromide.

| Extracted EPS      | P. aeruginosa EPS |     | P. putida EPS |     |                |
|--------------------|-------------------|-----|---------------|-----|----------------|
|                    | Ave.              | SD  | Ave.          | SD  | P <sup>1</sup> |
| DBP yield (µg/mgC) |                   |     |               |     |                |
| C-DBP              | 99.6              | 8.1 | 145.7         | 9.5 | 0.017          |
| N-DBP              | 2.6               | 0.2 | 4.6           | 1.2 | 0.073          |

1: One-tailed P-value of t-test. P<0.05 indicates that there is significant statistical difference between two extracted EPS

Table S3-6: t-test results of DBP yield (C-DBP and N-DBP) between polysaccharide based EPS and protein based EPS with bromide.

| Extracted EPS      | P. aeruginosa EPS |     | P. putida EPS |      | P <sup>1</sup> |
|--------------------|-------------------|-----|---------------|------|----------------|
|                    | Ave.              | SD  | Ave.          | SD   |                |
| DBP yield (µg/mgC) |                   |     |               |      |                |
| C-DBP              | 133.7             | 7.9 | 165.5         | 11.0 | 0.040          |
| N-DBP              | 1.8               | 0.2 | 3.1           | 0.6  | 0.051          |

1: One-tailed P-value of t-test. P<0.05 indicates that there is significant statistical difference between two extracted EPS
